# Supplementary material for: Discovery and antibacterial study of potential PPK1 inhibitors against uropathogenic E. coli
Source: PubMed Central journal article supplement — J Enzyme Inhib Med Chem. 2020 May 18;35(1):1224–32. doi: 10.1080/14756366.2020.1766453 (PMC7301697; doi:10.1080/14756366.2020.1766453), 2020-05-18

# Discovery and antibacterial study of potential PPK1 inhibitors against uropathogenic *E. coli*

## Supplemental materials

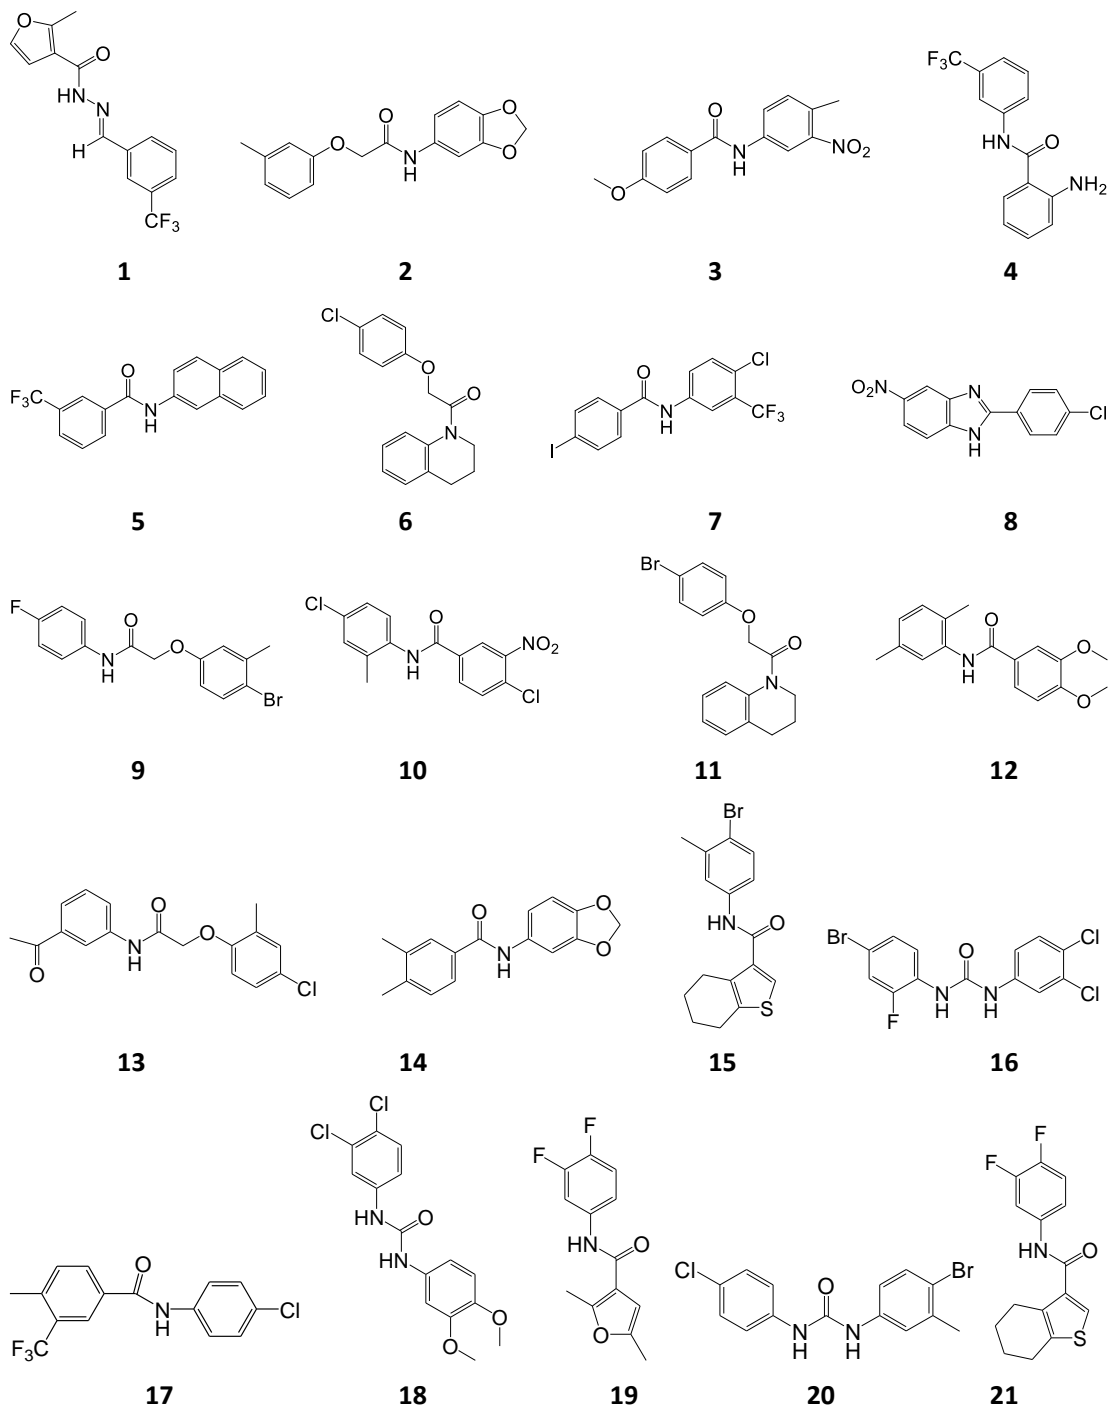

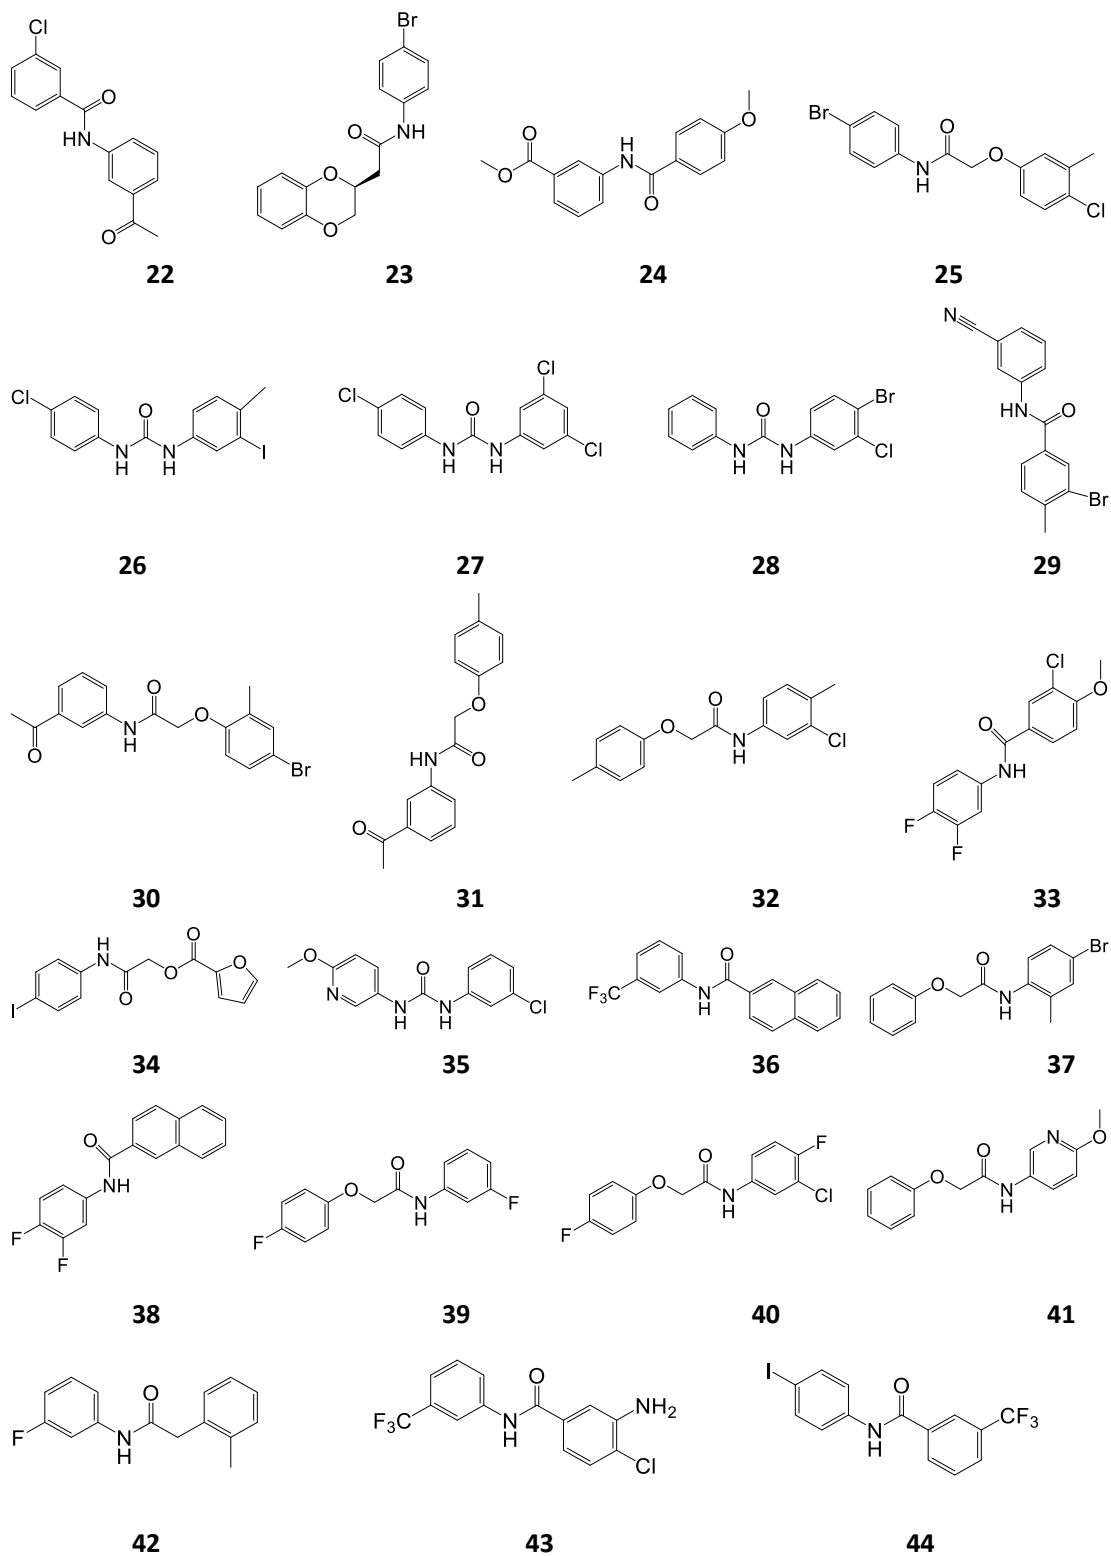

Fig S1. 44 compounds selected after the virtual screening

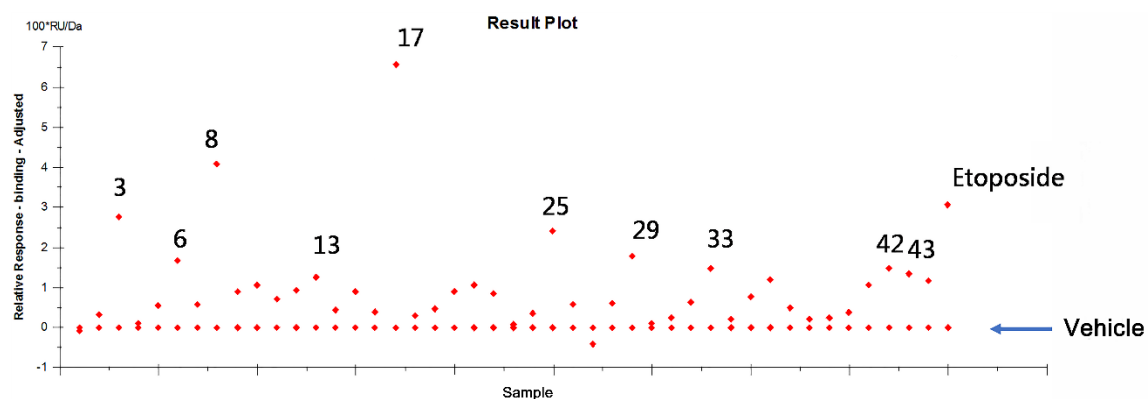

Fig S2. Relative binding responses of 44 compounds and etoposide with PPK1.

Table S1. Relative binding responses of 44 compounds and etoposide with PPK1.

| Compound  | Relative Biding Response<br>(100RU/Da) |
|-----------|----------------------------------------|
| 17        | 6.555                                  |
| 8         | 4.073                                  |
| Etoposide | 3.06                                   |
| 3         | 2.745                                  |
| 25        | 2.389                                  |
| 29        | 1.766                                  |
| 6         | 1.673                                  |
| 33        | 1.483                                  |
| 42        | 1.482                                  |
| 43        | 1.323                                  |
| 13        | 1.253                                  |
| 36        | 1.198                                  |
| 44        | 1.165                                  |
| 10        | 1.072                                  |
| 21        | 1.069                                  |
| 41        | 1.064                                  |
| 12        | 0.9229                                 |
| 15        | 0.9108                                 |
| 9         | 0.8927                                 |
| 20        | 0.8844                                 |
| 22        | 0.8409                                 |
| 35        | 0.7663                                 |
| 11        | 0.7053                                 |
| 32        | 0.6143                                 |
| 28        | 0.5949                                 |
| 7         | 0.5767                                 |
| 26        | 0.5627                                 |
| 5         | 0.5362                                 |

|    |          |
|----|----------|
| 37 | 0.4769   |
| 19 | 0.4519   |
| 14 | 0.4355   |
| 16 | 0.3937   |
| 40 | 0.392    |
| 24 | 0.3437   |
| 2  | 0.3333   |
| 18 | 0.298    |
| 31 | 0.2458   |
| 39 | 0.2351   |
| 38 | 0.2263   |
| 34 | 0.225    |
| 30 | 0.1171   |
| 4  | 0.1059   |
| 23 | 0.06621  |
| 1  | -0.07901 |
| 27 | -0.4218  |

---

A

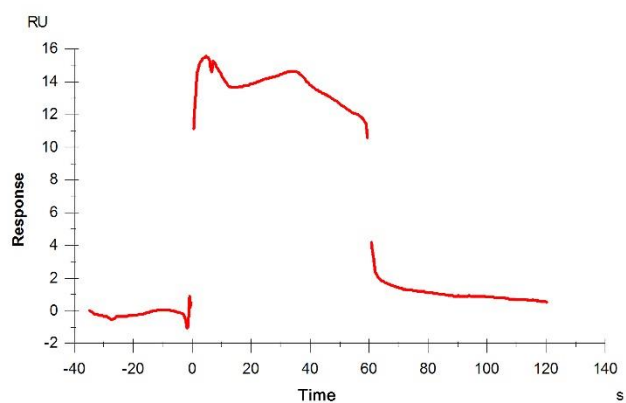

B

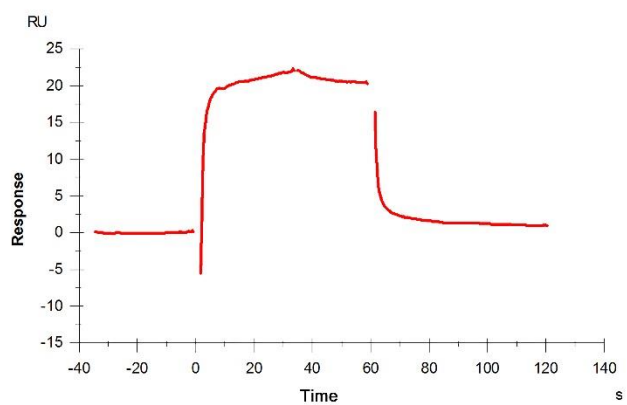

C

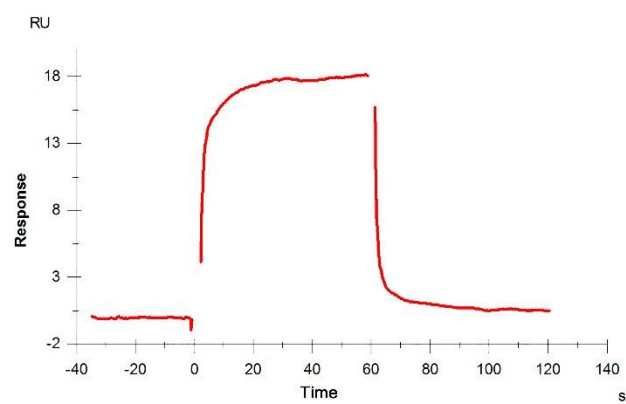

Fig S3. Sensorgrams of 8 (A), 17 (B) and etoposide (C) with PPK1.

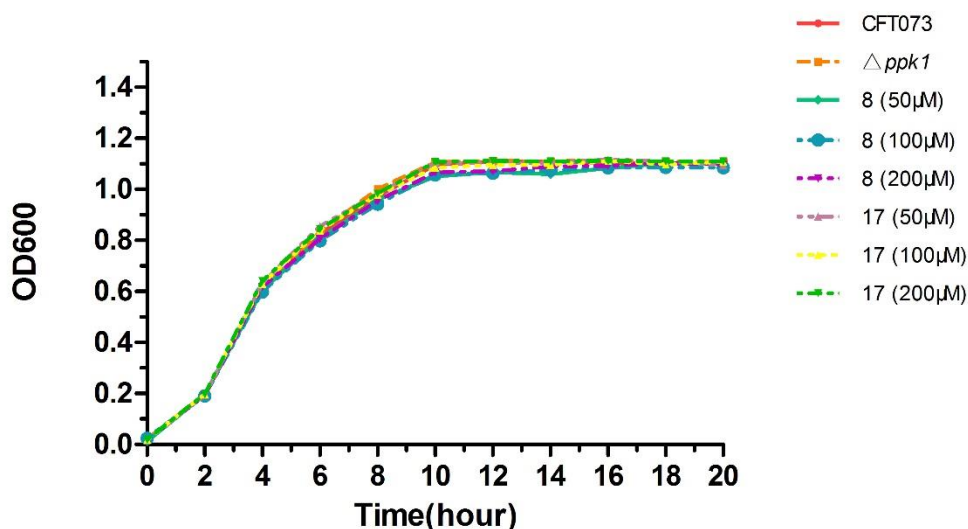

Fig S4. Growth curves of uropathogenic *E. coli* in the absence or presence of **8** and **17**.

#### Preparation and characterization of **8** and **17**

##### Compounds synthesis:

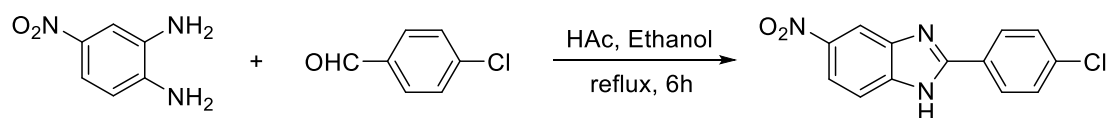

Scheme 2. Synthesis of compound **8**.

Experimental procedure: 2-(4-chlorophenyl)-5-nitro-1H-benzo[d]imidazole(**8**). To the ethanol (10 mL) solvent added 4-nitrobenzene-1,2-diamine (155 mg, 1 mmol) and 4-chlorobenzaldehyde (140 mg, 1 mmol). Several drops of glacial HAc were added before the mixture was heated under 80°C for 6h. Then the solvent was evaporated under reduced pressure. The remaining residue was extracted with EtOAc, and the combined organic layers were washed with brine, dried over anhydrous Na<sub>2</sub>SO<sub>4</sub>, filtered and concentrated. The crude product was purified by silica gel column chromatography eluting with PE/EA (3/1) to afford the off-white solid compound, 250

mg. Yield: 80%.  $^1\text{H}$  NMR (400 MHz, Chloroform-*d*)  $\delta$  8.61 (s, 1H), 8.02 (d,  $J = 8.6$  Hz, 2H), 7.87 (d,  $J = 8.2$  Hz, 2H), 7.47 (d,  $J = 8.3$  Hz, 2H), 6.72 (d,  $J = 8.4$  Hz, 1H).  $^{13}\text{C}$  NMR (101 MHz, Chloroform-*d*)  $\delta$  158.4, 148.6, 138.8, 138.1, 135.0, 134.1, 130.2, 129.3, 124.5, 113.2. ESI-MS $^+$ : 273.08.

### $^1\text{H}$ NMR, $^{13}\text{C}$ NMR

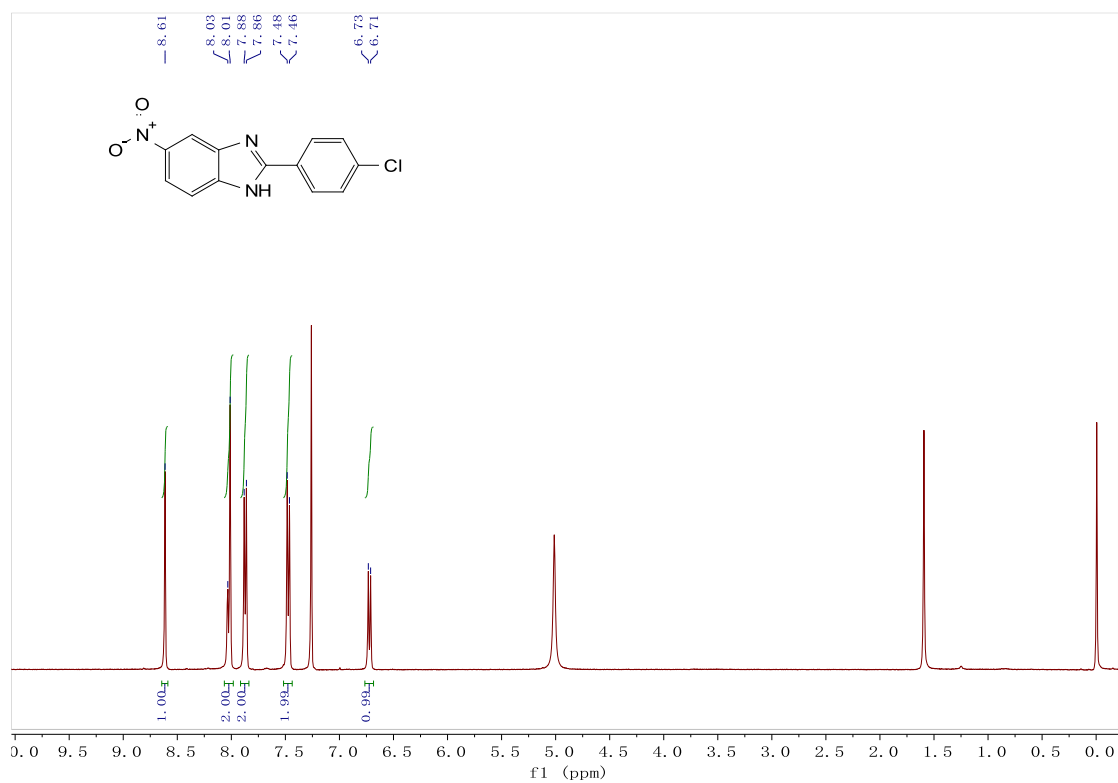

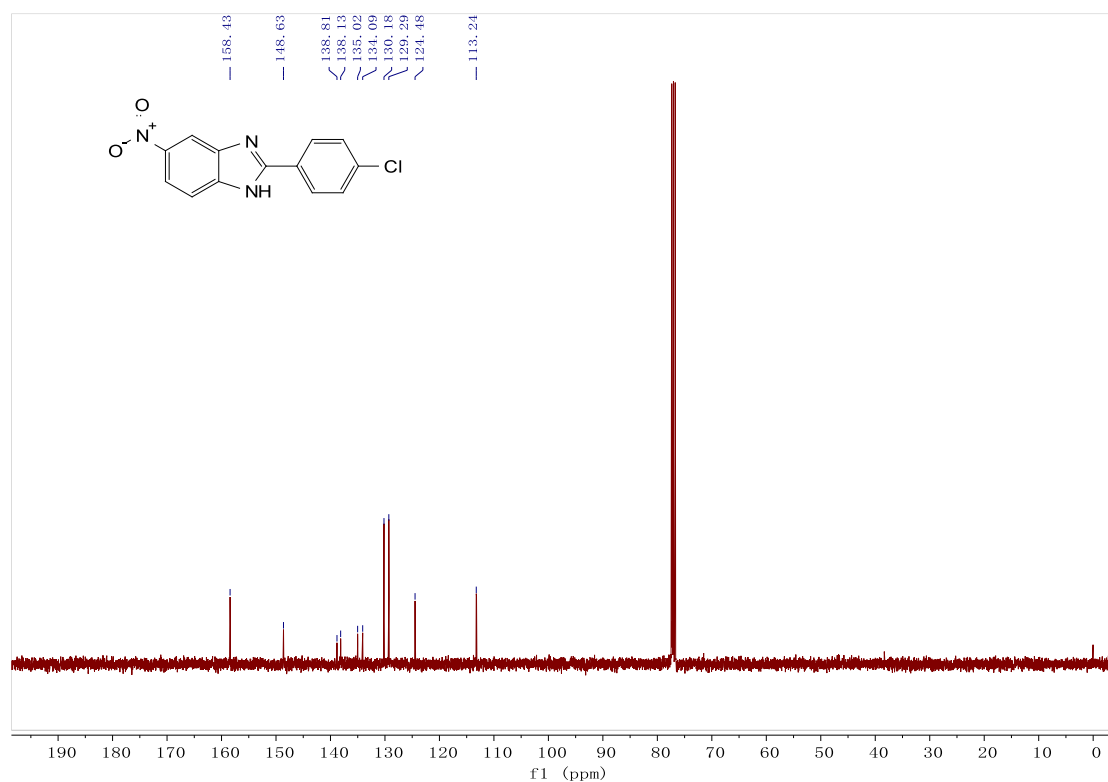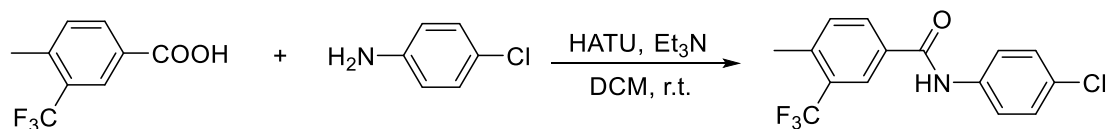

Scheme 1. Synthesis of compound **17**.

Experimental procedure: N-(4-chlorophenyl)-4-methyl-3-(trifluoromethyl)benzamide (**17**). A mixture of 4-methyl-3-(trifluoromethyl)benzoic acid (103 mg, 0.5 mmol) and HATU (247 mg, 0.65 mmol) in DCM was stirred in the room temperature for 5 min, and to the solvent 4-chloroaniline (77 mg, 0.6 mmol) and several drops of Et<sub>3</sub>N were then added. The final mixture was reacted overnight before the solvent was removed under reduced pressure. The residue was extracted with EtOAc, and the combined organic layers were washed with brine, dried over anhydrous Na<sub>2</sub>SO<sub>4</sub>, filtered and concentrated. The crude product was purified by silica gel column chromatography



eluting with PE/EA (4/1) to afford the colored solid compound, 140 mg. Yield: 90%.

$^1\text{H}$  NMR (400 MHz, Chloroform-*d*)  $\delta$  8.07 (s, 1H), 7.96 – 7.86 (m, 2H), 7.61 – 7.56 (m, 2H), 7.40 (d,  $J = 7.9$  Hz, 1H), 7.35 – 7.30 (m, 2H), 2.55 (s, 3H).  $^{13}\text{C}$  NMR (101 MHz, Chloroform-*d*)  $\delta$  164.4, 141.1, 136.2, 132.5, 130.2, 129.9, 129.2, 125.3, 124.6, 122.6, 121.6. ESI-MS<sup>+</sup>: 314.15.

### $^1\text{H}$ NMR, $^{13}\text{C}$ NMR

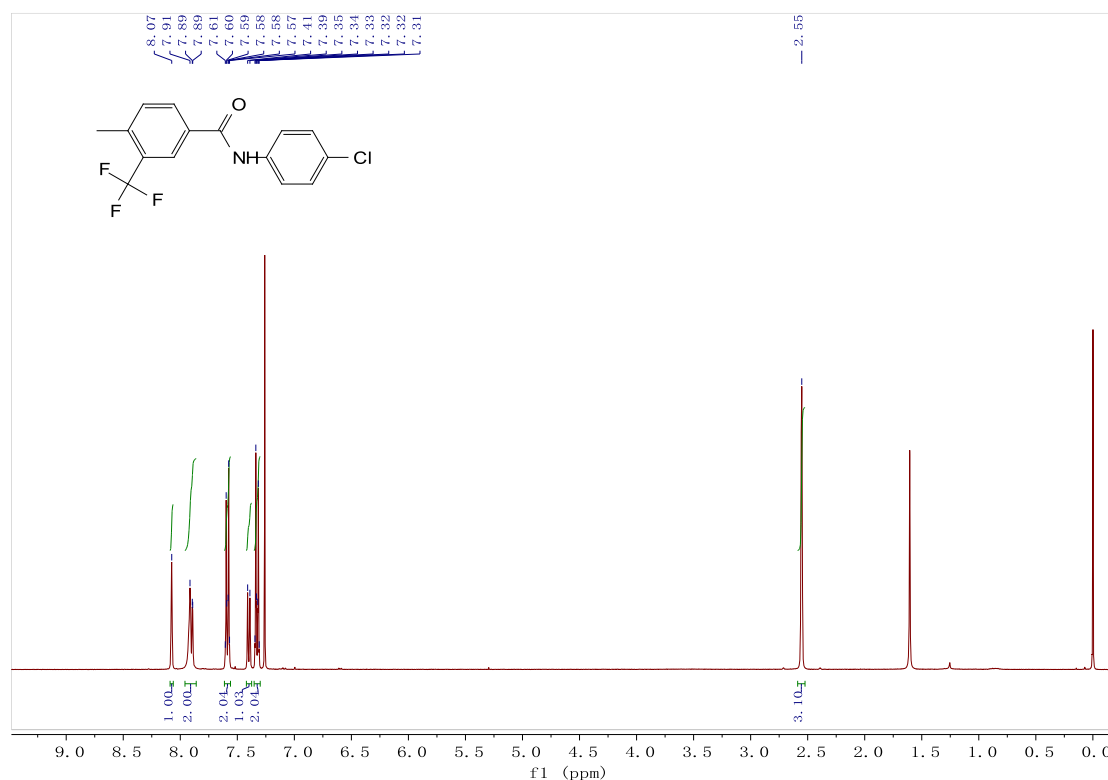

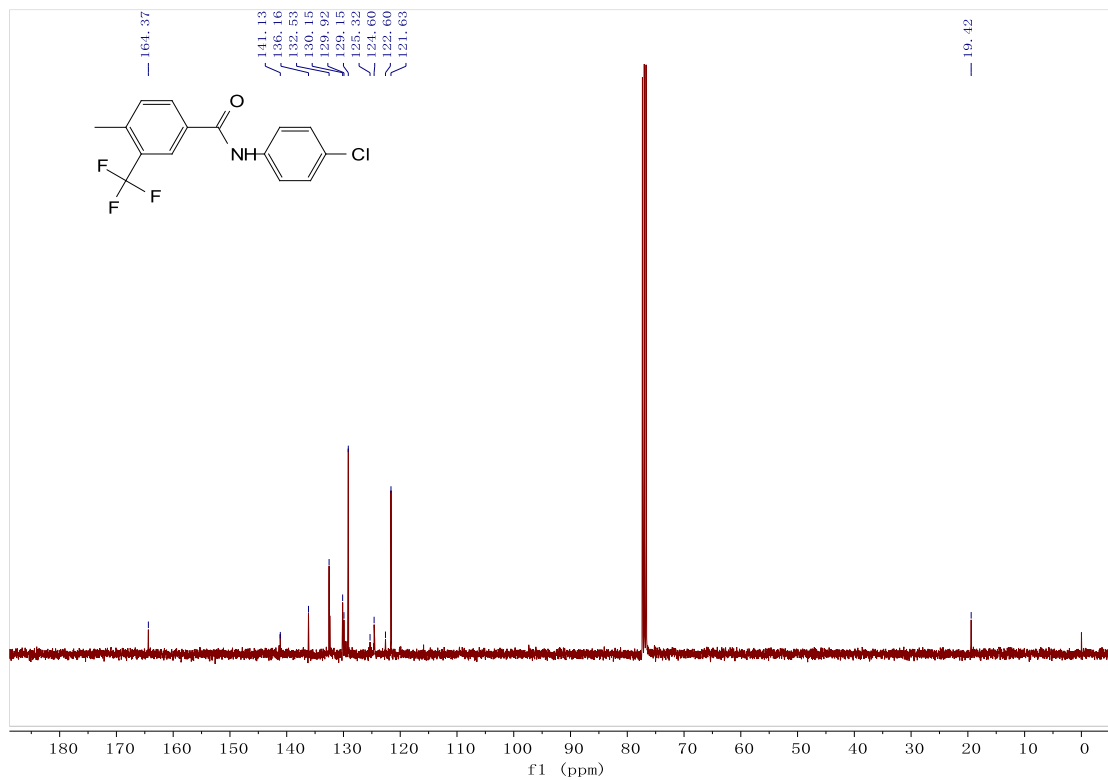

Supplement: IENZ_A_1766453_SM3689.pdf [file IENZ_A_1766453_SM3689.pdf]
